# Supplementary material for: Simpler and highly sensitive enzyme-free sensing of urea via NiO nanostructures modified electrode
Source: Royal Society of Chemistry journal article supplement (doi:10.1039/c6ra00521g), 2016-01-01
Supplement: c6ra00521g1.pdf [file c6ra00521g1.pdf]

## Supplementary Information

### Simpler and highly sensitive enzyme free sensing of urea via NiO nanostructures modified electrode

Munazza Arain,<sup>a</sup> Ayman Nafady,<sup>b,c</sup> Sirajuddin,<sup>d,\*</sup> Zafar Hussain Ibupoto,<sup>a</sup> Syed Tufail Hussain Sherazi,<sup>d</sup> Tayyaba Shaikh,<sup>d</sup> Hamayun Khan,<sup>e</sup> Ali Alsalmeh,<sup>b</sup> Abdul Niaz,<sup>f</sup> and Magnus Willander,<sup>g</sup>

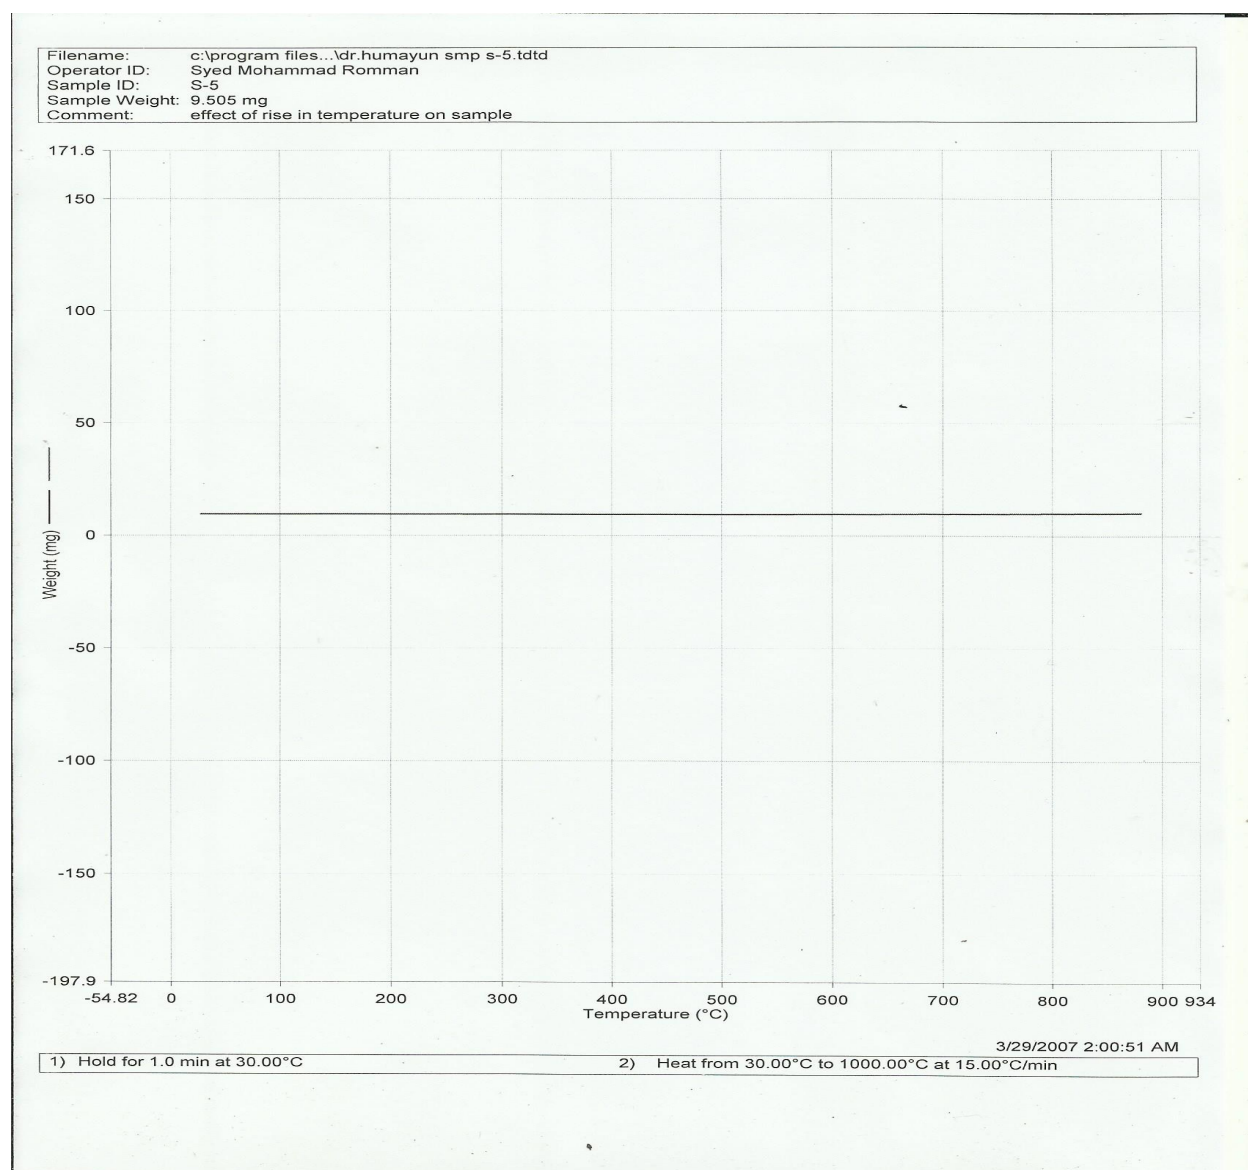

**Figure S1.** TGA plot of NiO nanostructures in the range of 30 – 1000 °C

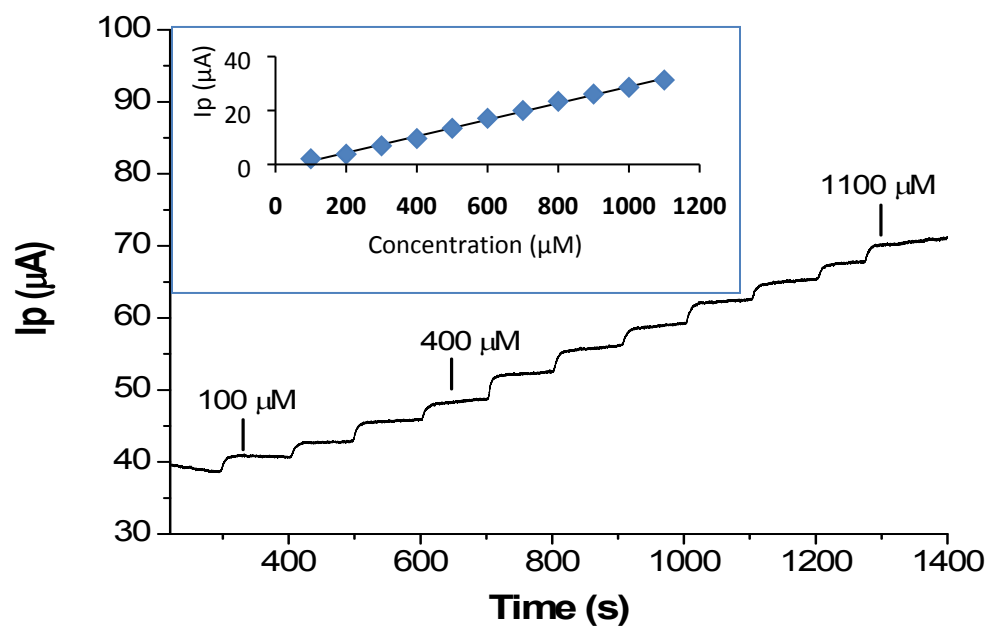

**Figure S2.** Calibration curve with slow scan rate for urea detection in the range of 0.1 -1.1 mM, inset shows corresponding calibration plot

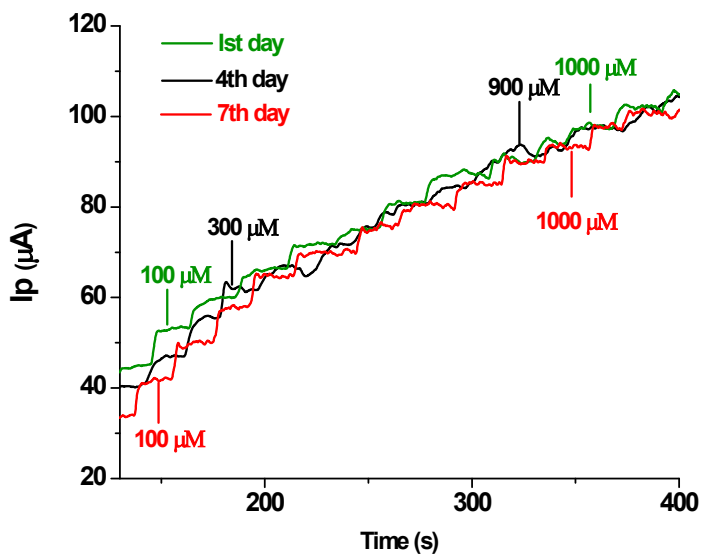

**Figure S3A.** Amperometric  $I_p$  Vs time calibration curves of urea detection for a single NiO modified electrode, green line, at 1<sup>st</sup> day; black line after 4<sup>th</sup> day and red line after 7<sup>th</sup> day.

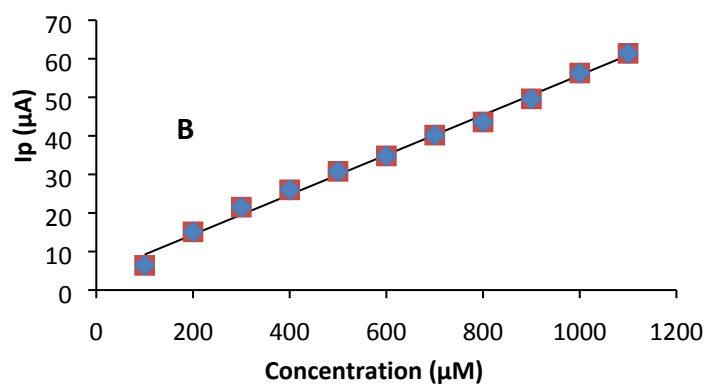

**Figure S3B.** Calibration plot related to green line (1<sup>st</sup> day)

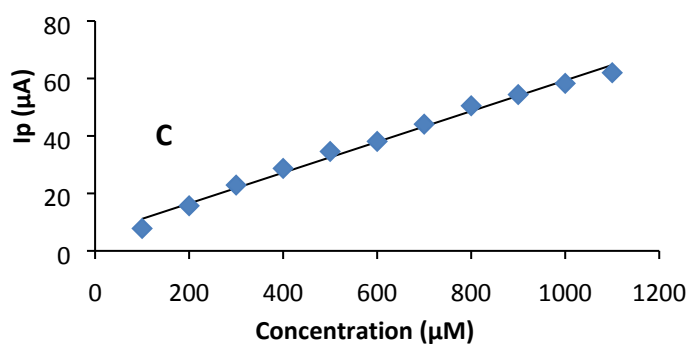

**Figure S3C.** Calibration plot related to black line (4<sup>th</sup> day)

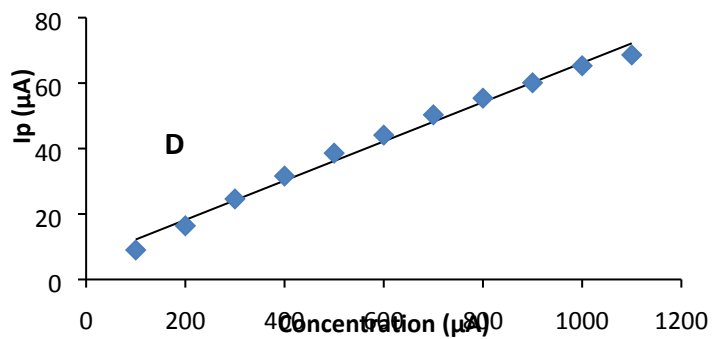

**Figure S3D.** Calibration plot related to red line (4<sup>th</sup> day)
